# Supplementary material for: Efficacious genome editing in infant mice with glycogen storage disease type Ia
Source: JCI journal article supplement (doi:10.1172/jci.insight.181760), 2025-07-31

Figure 5A. Intact Gel

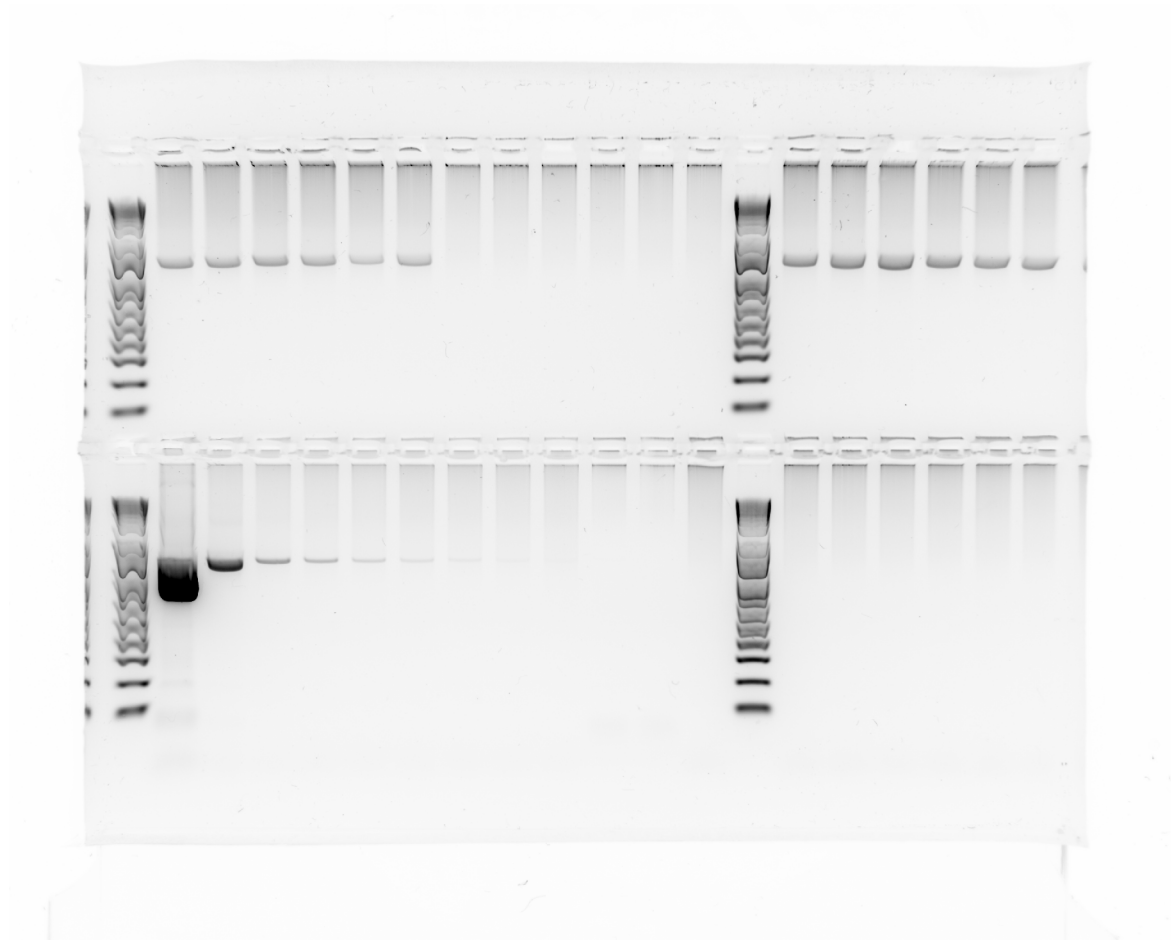

Figure 5B. Intact Gels

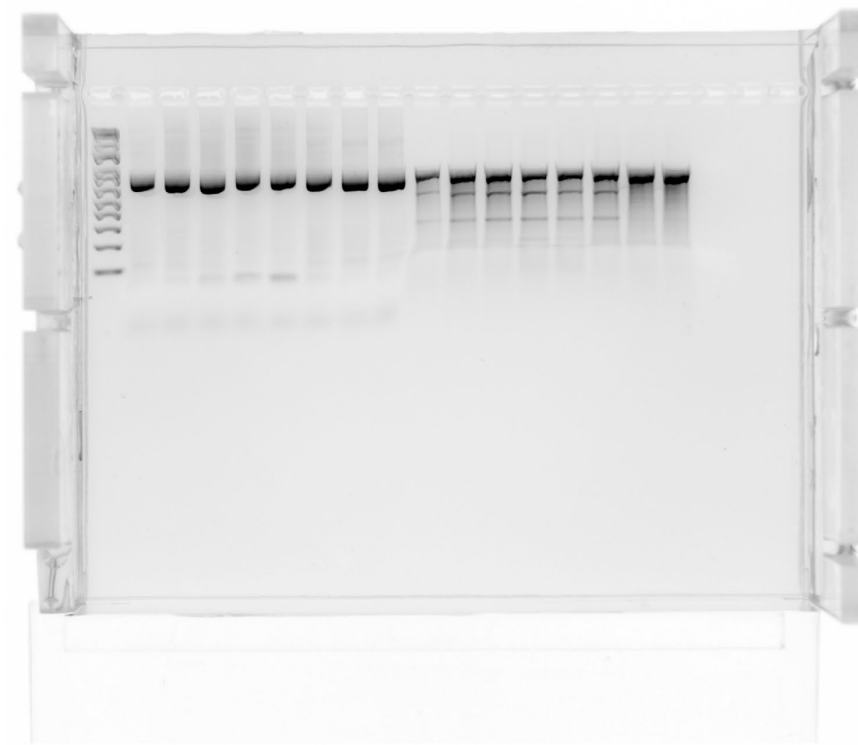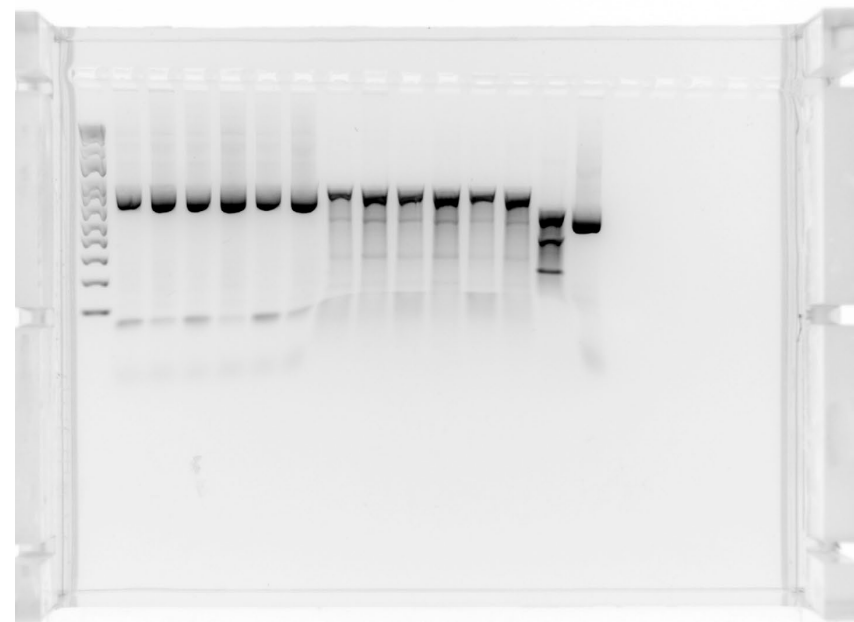

Supplement: sd2 [file 2]
